# Supplementary material for: Elective amputation and bionic substitution restore functional hand use after critical soft tissue injuries
Source: PubMed Central journal article supplement (PMC5056343; doi:10.1038/srep34960), 2016-10-10
Supplement: srep34960-s1.pdf [file srep34960-s1.pdf]

## **Elective amputation and bionic substitution restore functional hand use after critical soft tissue injuries**

Oskar C. Aszmann<sup>a,b,\*</sup>, Ivan Vujaklija<sup>c</sup>, Aidan D. Roche<sup>b</sup>, Stefan Salminger<sup>a,b</sup>, Malvina Herceg<sup>f</sup>, Agnes Sturma<sup>b,d</sup>, Laura A. Hruby<sup>b</sup>, Anna Pittermann<sup>a</sup>, Christian Hofer<sup>e</sup>, Sebastian Amsuess<sup>e</sup> & Dario Farina<sup>c</sup>

<sup>a</sup>Division of Plastic and Reconstructive Surgery, Department of Surgery, Medical University of Vienna, Währinger Gürtel 18-20, 1090 Vienna, AUSTRIA

<sup>b</sup>Christian Doppler Laboratory for Restoration of Extremity Function, Medical University of Vienna, Währinger Gürtel 18-20, 1090 Vienna, AUSTRIA

<sup>c</sup>Institute of Neurorehabilitation Systems, Bernstein Focus Neurotechnology Göttingen, University Medical Center Göttingen, Georg-August University, Von-Siebold-Str. 6, 37075 Göttingen, GERMANY

<sup>d</sup>Master Degree Program “Health Assisting Engineering”, University of Applied Sciences FH Campus Wien, Favoritenstraße 226, 1100 Vienna, AUSTRIA

<sup>e</sup>Otto Bock Healthcare Products GmbH, Brehmstraße 16, 1110 Vienna, AUSTRIA

<sup>f</sup>Department of Physical and Rehabilitation Medicine, Medical University of Vienna, Währinger Gürtel 18-20, 1090 Vienna, AUSTRIA

## **Supplementary Information**

[Supplementary Video 1 Functional outcomes observed in Patient 2 pre- and post- intervention as well as during the hybrid fitting](#)

[Supplementary Video 2 Post-intervention follow up of Patient 1 fitted with the advanced prosthetic system using simultaneous and proportional control](#)
